# Supplementary material
Source: MDPI journal article supplement (https://www.mdpi.com/1999-4907/10/11/958)
Supplement: s1 [file s1]

**Supplementary Materials:**

**Table S1.** Grouping of Forest Inventory and Analysis (FIA) forest types used to evaluate Forest Vegetation Simulator- Fire and Fuels Extension (FVS-FFE) mortality predictions.

| <b>Forest Type Group</b> | <b>FIA Forest Type</b>         | <b>Number of Stands</b> |
|--------------------------|--------------------------------|-------------------------|
| California mixed conifer | California mixed conifer       | 105                     |
| California oaks          | Canyon live oak                | 41                      |
| California oaks          | Interior live oak              | 18                      |
| California oaks          | Coast live oak                 | 13                      |
| California oaks          | California black oak           | 12                      |
| California oaks          | Tanoak                         | 12                      |
| California oaks          | Blue oak                       | 1                       |
| Douglas-fir              | Douglas-fir                    | 17                      |
| Douglas-fir              | Bigcone Douglas-fir            | 2                       |
| Firs                     | Subalpine fir                  | 10                      |
| Firs                     | Grand fir                      | 8                       |
| Firs                     | Engelmann spruce/subalpine fir | 5                       |
| Firs                     | Red fir                        | 3                       |
| Other conifers           | Redwood (Coast?)               | 3                       |
| Other conifers           | Mountain hemlock               | 2                       |
| Other conifers           | Western redcedar               | 1                       |
| Other hardwoods          | California laurel              | 3                       |
| Other hardwoods          | Bigleaf maple                  | 2                       |
| Other hardwoods          | Pacific madrone                | 2                       |
| Other hardwoods          | Aspen                          | 1                       |
| Other hardwoods          | Cercocarpus woodland           | 1                       |
| Other hardwoods          | Cottonwood                     | 1                       |
| Other hardwoods          | Giant chinkapin                | 1                       |
| Other hardwoods          | Other hardwoods                | 1                       |
| Pines                    | Jeffrey pine                   | 9                       |
| Pines                    | Lodgepole pine                 | 6                       |
| Pines                    | Gray pine                      | 1                       |
| Pines                    | Knobcone pine                  | 1                       |
| Pinyon/juniper           | Pinyon/juniper woodland        | 9                       |
| Pinyon/juniper           | Western juniper                | 3                       |
| Ponderosa pine           | Ponderosa pine                 | 32                      |
| White fir                | White fir                      | 16                      |

**Table S2.** Mean observed bole char height (m), mean error and root mean square error (RMSE )(m) of differences between field-assessed bole char height and weather scenario informed modeled flame length, by weather scenario, by forest type group, with weather scenario enabling error closest to zero in bold.

| Forest Type Group        | Max Wind | POTSev | Mean Wind   | POTMod      | Min Wind    |
|--------------------------|----------|--------|-------------|-------------|-------------|
| <b>Error</b>             |          |        |             |             |             |
| California mixed conifer | 4.5      | 7      | <b>0.2</b>  | -1.2        | -0.8        |
| California oaks          | 17.9     | 0.9    | 1.9         | -0.4        | <b>0.1</b>  |
| Douglas-fir              | 6.7      | 10     | 2           | -1          | <b>0.7</b>  |
| Firs                     | 9.3      | 15.2   | <b>-0.2</b> | -1.6        | -1.2        |
| Other conifers           | 33.8     | 5.2    | <b>-1</b>   | -1.5        | -1.5        |
| Other hardwoods          | 6.8      | 1.9    | 2.9         | <b>-0.2</b> | 0.9         |
| Pines                    | 6.8      | 6.8    | <b>0.4</b>  | -0.5        | <b>-0.4</b> |
| Pinyon/juniper           | 1.4      | 3.1    | <b>-0.4</b> | -1.3        | -1.3        |
| Ponderosa pine           | 1.1      | 4.9    | <b>-0.5</b> | -1.1        | -1.1        |
| White fir                | 4        | 10.4   | <b>-0.2</b> | -1.1        | -0.8        |
| <b>RMSE</b>              |          |        |             |             |             |
| California mixed conifer | 8.7      | 11.7   | 3.5         | <b>2</b>    | 2.5         |
| California oaks          | 34.5     | 3.1    | 4.2         | <b>1.5</b>  | 2           |
| Douglas-fir              | 13.9     | 14.1   | 5.6         | <b>2.4</b>  | 4.4         |
| Firs                     | 14.6     | 18.4   | 2.3         | 2.2         | <b>1.6</b>  |
| Other conifers           | 75.5     | 11     | <b>2.3</b>  | <b>2.3</b>  | <b>2.3</b>  |
| Other hardwoods          | 11       | 4.2    | 5.6         | <b>0.9</b>  | 2.6         |
| Pines                    | 14.3     | 12.7   | 2           | <b>1</b>    | 1.3         |
| Pinyon/juniper           | 3.2      | 4.8    | <b>1.3</b>  | 1.5         | 1.6         |
| Ponderosa pine           | 3.6      | 9.2    | 2           | 1.8         | <b>1.7</b>  |
| White fir                | 6.5      | 12.8   | 1.5         | 1.4         | <b>1.3</b>  |

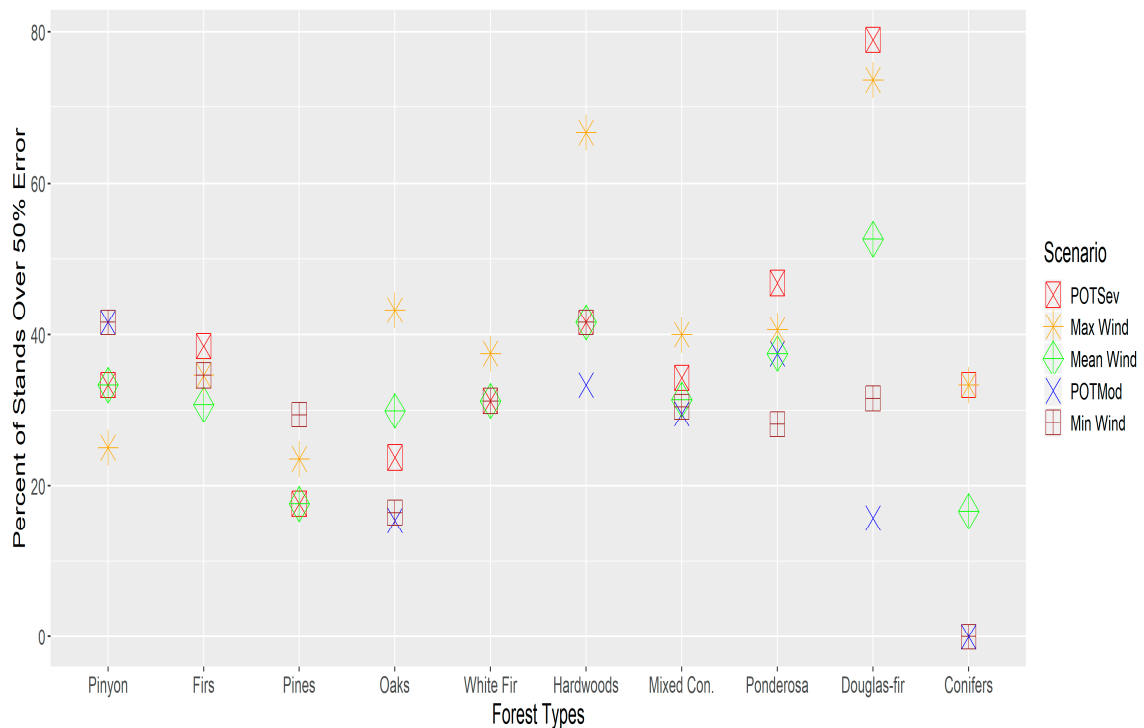

**Figure S1.** Percentage of stands with over 50% error (absolute) in fire-induced mortality as a percent of pre-fire, live tree basal area by weather scenario, and forest type group.

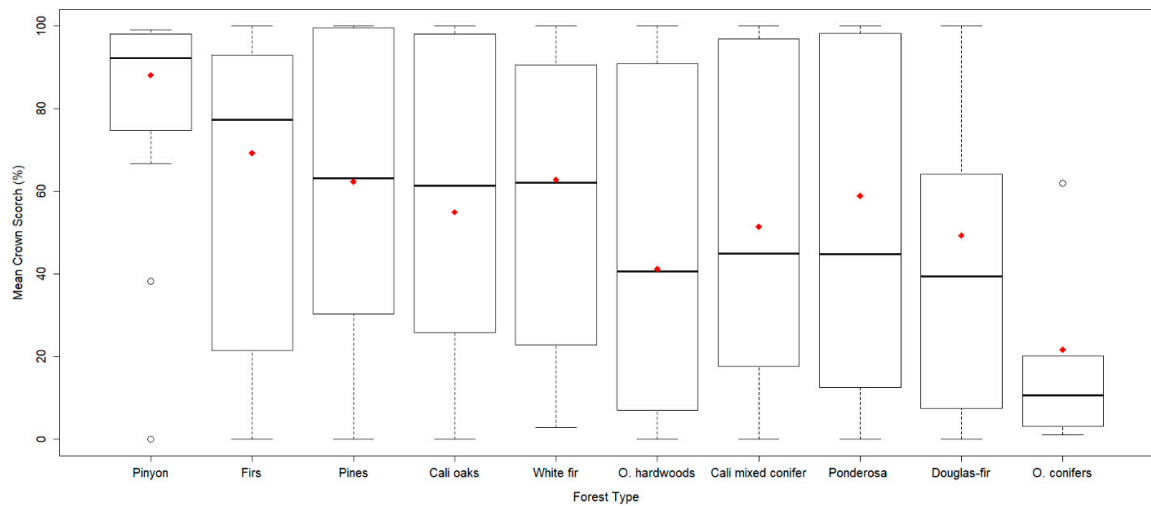

**Figure S2.** Boxplots of observed stand-level crown scorch (% of crown length scorched and burned) by forest type group, showing means (red diamonds), medians (black lines), quartiles (box ends), 5<sup>th</sup> and 95<sup>th</sup> percentiles (whiskers), and outlier (open circles).

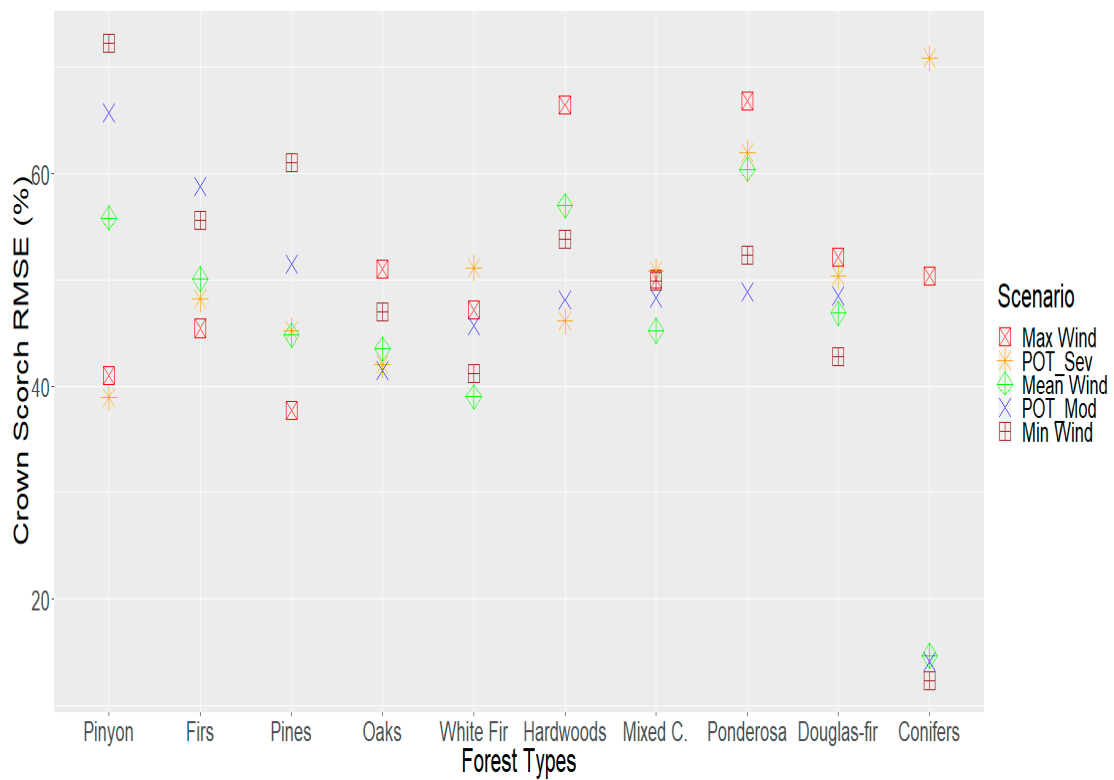

**Figure S3.** Root mean square error (RMSE) for model-predicted mean stand-level crown scorch (%) by forest type group and weather scenario.

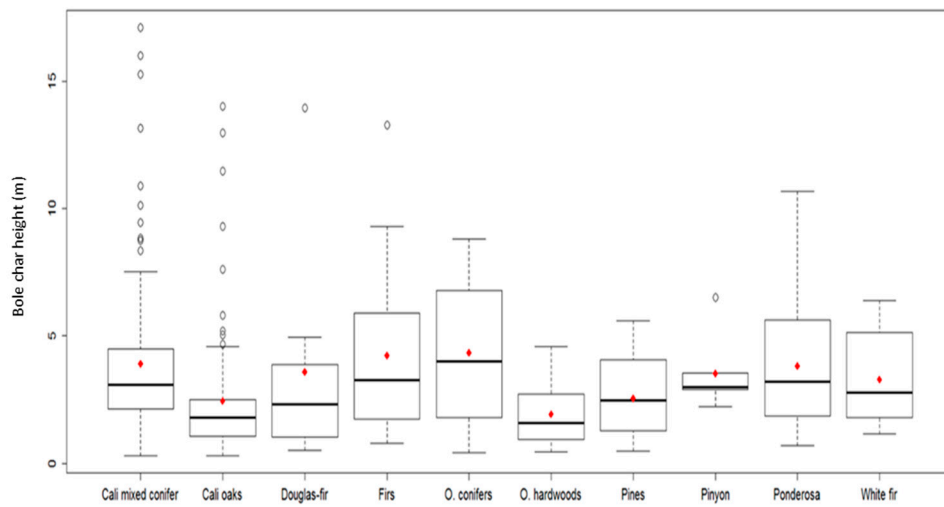

**Figure S4.** Boxplots of mean stand-level bole char height (meters) by forest type. Boxes depict quantiles, whiskers are 5<sup>th</sup> and 95<sup>th</sup> percentiles, and red diamonds are means.

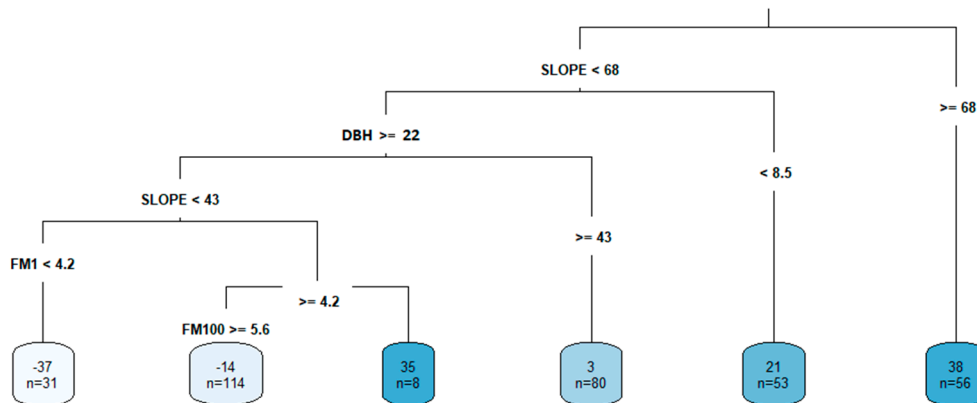

**Figure S5.** Pruned regression tree of pre-fire stand measurements, remote automated weather stations (RAWS) weather, and modeled attributes on predicted mortality errors (predicted – observed % basal area (BA)) in the Mean Wind weather scenario. Values in boxes are mortality percent and number of stands. Slope is topographic slope (%), dia1\_mean is mean stand tree diameter (in), FM1\_Mean and FM100\_mean are 1- and 100-hr fuel moisture (%), respectively.
